# Supplementary material
Source: PubMed Central journal article supplement (PMC10266383)
Supplement: EIJ-D-22-00843_Leone_SD.pdf [file EIJ-D-22-00843_Leone_SD.pdf]

## Supplementary data

**Supplementary Table 1. Baseline demographic characteristics according to prosthesis implanted.**

| <b>Characteristic</b>                     | <b>Evolut R/Pro<br/>(n = 750)</b> | <b>Acurate Neo<br/>(n = 170)</b> | <b>Portico<br/>(n = 172)</b> | <b>Sapien 3<br/>(n = 286)</b> | <b>P value</b>   |
|-------------------------------------------|-----------------------------------|----------------------------------|------------------------------|-------------------------------|------------------|
| Age, years                                | 83.0 ± 6.3                        | 83.0 ± 5.8                       | 82.7 ± 5.9                   | 82.5 ± 6.5                    | 0.689            |
| Female                                    | 89.1 (668)                        | 90.6 (154)                       | 91.3 (157)                   | 88.8 (254)                    | 0.781            |
| Weight, kg                                | 63.2 ± 14.5                       | 64.5 ± 12.9                      | 66.2 ± 13.8                  | 67.5 ± 16.4                   | <b>&lt;0.001</b> |
| Height, cm                                | 157.2 ± 7.8                       | 157.8 ± 7.1                      | 157.7 ± 6.0                  | 159.1 ± 8.5                   | <b>0.009</b>     |
| Body surface area, m <sup>2</sup>         | 1.62 ± 0.21                       | 1.66 ± 0.17                      | 1.70 ± 0.19                  | 1.71 ± 0.23                   | <b>&lt;0.001</b> |
| Body mass index, kg/m <sup>2</sup>        | 25.9 ± 5.5                        | 26.1 ± 4.6                       | 26.7 ± 5.2                   | 26.5 ± 5.5                    | 0.204            |
| Hypertension                              | 84.5 (633)                        | 82.3 (140)                       | 86.6 (149)                   | 89.2 (255)                    | 0.157            |
| Diabetes mellitus                         | 25.3 (190)                        | 25.9 (44)                        | 30.8 (53)                    | 26.9 (77)                     | 0.527            |
| Dyslipidemia                              | 53.9 (403)                        | 50.0 (85)                        | 50.3 (86)                    | 48.4 (138)                    | 0.396            |
| COPD                                      | 10.3 (77)                         | 14.1 (24)                        | 6.4 (11)                     | 16.1 (46)                     | <b>0.006</b>     |
| Peripheral artery disease or previous PTA | 13.7 (99)                         | 8.2 (14)                         | 10.0 (17)                    | 9.5 (26)                      | <b>0.090</b>     |
| Cerebrovascular disease                   | 9.3 (70)                          | 5.9 (10)                         | 12.3 (21)                    | 14.7 (42)                     | <b>0.012</b>     |
| Previous PCI                              | 20.4 (153)                        | 19.4 (33)                        | 27.5 (47)                    | 23.9 (68)                     | 0.149            |
| Previous CABG                             | 5.9 (44)                          | 4.1 (7)                          | 5.8 (10)                     | 7.3 (21)                      | 0.569            |
| Previous MI                               | 8.8 (65)                          | 10.2 (16)                        | 10.5 (18)                    | 10.2 (29)                     | 0.842            |

|                         |            |           |            |            |              |
|-------------------------|------------|-----------|------------|------------|--------------|
| Coronary artery disease | 37.0 (276) | 31.2 (53) | 36.3 (62)  | 46.8 (134) | <b>0.004</b> |
| PM or ICD               | 10.3 (77)  | 11.2 (19) | 11.6 (20)  | 14.3 (41)  | 0.332        |
| Atrial fibrillation     | 31.3 (143) | 31.2 (39) | 32.8 (43)  | 21.9 (44)  | <b>0.066</b> |
| Angina                  | 19.2 (132) | 19.4 (33) | 17.2 (20)  | 27.8 (45)  | <b>0.075</b> |
| NYHA class III or IV    | 67.5 (506) | 57.6 (98) | 70.9 (122) | 71.0 (203) | <b>0.019</b> |
| STS-PROM, %             | 6.0 ± 4.4  | 5.5 ± 3.8 | 5.1 ± 2.7  | 5.7 ± 3.6  | <b>0.072</b> |

Values are mean ± standard deviation or %(n). The values in **bold** represent differences between groups with p <0.100.

BAV = balloon aortic valvuloplasty; BMI = body mass index; BSA = body surface area; CABG = coronary artery bypass graft; CAD = coronary artery disease; COPD = chronic obstructive pulmonary disease; ICD = implantable cardioverter-defibrillator; MI = myocardial infarction; NT-proBNP = N-terminal pro-brain natriuretic peptide; NYHA = New York Heart Association; PTA = percutaneous transluminal angioplasty; PCI = percutaneous coronary intervention; PM = pacemaker; STS-PROM = Society of Thoracic Surgeons Predicted Risk of Mortality.

P values for Age

|                    | <b>Evolut R/Pro</b> | <b>Acurate Neo</b> | <b>Portico</b> |
|--------------------|---------------------|--------------------|----------------|
| <b>Acurate Neo</b> | 1.000               |                    |                |
| <b>Portico</b>     | 1.000               | 1.000              |                |
| <b>Sapien 3</b>    | 1.000               | 1.000              | 1.000          |

P values for Female

|                    | <b>Evolut R/Pro</b> | <b>Acurate Neo</b> | <b>Portico</b> |
|--------------------|---------------------|--------------------|----------------|
| <b>Acurate Neo</b> | 0.561               |                    |                |
| <b>Portico</b>     | 0.394               | 0.824              |                |
| <b>Sapien 3</b>    | 0.906               | 0.550              | 0.399          |

P values for BMI

|                    | <b>Evolut R/Pro</b> | <b>Acurate Neo</b> | <b>Portico</b> |
|--------------------|---------------------|--------------------|----------------|
| <b>Acurate Neo</b> | 1.000               |                    |                |
| <b>Portico</b>     | 0.489               | 1.000              |                |
| <b>Sapien 3</b>    | 0.573               | 1.000              | 1.000          |

P values for BSA

|                    | <b>Evolut R/Pro</b> | <b>Acurate Neo</b> | <b>Portico</b> |
|--------------------|---------------------|--------------------|----------------|
| <b>Acurate Neo</b> | 0.868               |                    |                |
| <b>Portico</b>     | <b>0.001</b>        | 1.000              |                |
| <b>Sapien 3</b>    | <b>&lt;0.001</b>    | 0.656              | 1.000          |

P values for Weight

|                    | <b>Evolut R/Pro</b> | <b>Acurate Neo</b> | <b>Portico</b> |
|--------------------|---------------------|--------------------|----------------|
| <b>Acurate Neo</b> | 1.000               |                    |                |
| <b>Portico</b>     | <b>0.098</b>        | 1.000              |                |
| <b>Sapien 3</b>    | <b>&lt;0.001</b>    | 0.208              | 1.000          |

P values for Diabetes Mellitus

|                    | <b>Evolut R/Pro</b> | <b>Acurate Neo</b> | <b>Portico</b> |
|--------------------|---------------------|--------------------|----------------|
| <b>Acurate Neo</b> | 0.882               |                    |                |
| <b>Portico</b>     | 0.141               | 0.312              |                |
| <b>Sapien 3</b>    | 0.601               | 0.808              | 0.371          |

P values for Dyslipidemia

|                    | <b>Evolut R/Pro</b> | <b>Acurate Neo</b> | <b>Portico</b> |
|--------------------|---------------------|--------------------|----------------|
| <b>Acurate Neo</b> | 0.360               |                    |                |
| <b>Portico</b>     | 0.397               | 0.957              |                |
| <b>Sapien 3</b>    | 0.117               | 0.744              | 0.699          |

P values for Hypertension

|                    | <b>Evolut R/Pro</b> | <b>Acurate Neo</b> | <b>Portico</b> |
|--------------------|---------------------|--------------------|----------------|
| <b>Acurate Neo</b> | 0.487               |                    |                |
| <b>Portico</b>     | 0.485               | 0.275              |                |
| <b>Sapien 3</b>    | <b>0.055</b>        | <b>0.039</b>       | 0.416          |

P values for COPD

|                    | <b>Evolut R/Pro</b> | <b>Acurate Neo</b> | <b>Portico</b> |
|--------------------|---------------------|--------------------|----------------|
| <b>Acurate Neo</b> | 0.149               |                    |                |
| <b>Portico</b>     | 0.123               | <b>0.019</b>       |                |
| <b>Sapien 3</b>    | <b>0.010</b>        | 0.573              | <b>0.003</b>   |

P values for Peripheral artery disease or previous PTA

|                    | <b>Evolut R/Pro</b> | <b>Acurate Neo</b> | <b>Portico</b> |
|--------------------|---------------------|--------------------|----------------|
| <b>Acurate Neo</b> | <b>0.054</b>        |                    |                |
| <b>Portico</b>     | 0.198               | 0.572              |                |
| <b>Sapien 3</b>    | <b>0.076</b>        | 0.645              | 0.869          |

P values for Cerebrovascular disease

|                    | <b>Evolut R/Pro</b> | <b>Acurate Neo</b> | <b>Portico</b> |
|--------------------|---------------------|--------------------|----------------|
| <b>Acurate Neo</b> | 0.149               |                    |                |
| <b>Portico</b>     | 0.244               | <b>0.040</b>       |                |
| <b>Sapien 3</b>    | <b>0.013</b>        | <b>0.004</b>       | 0.471          |

P values for Previous PCI

|                    | <b>Evolut R/Pro</b> | <b>Acurate Neo</b> | <b>Portico</b> |
|--------------------|---------------------|--------------------|----------------|
| <b>Acurate Neo</b> | 0.760               |                    |                |
| <b>Portico</b>     | <b>0.044</b>        | <b>0.079</b>       |                |
| <b>Sapien 3</b>    | 0.222               | 0.261              | 0.400          |

P values for Previous CABG

|                    | <b>Evolut R/Pro</b> | <b>Acurate Neo</b> | <b>Portico</b> |
|--------------------|---------------------|--------------------|----------------|
| <b>Acurate Neo</b> | 0.365               |                    |                |
| <b>Portico</b>     | 0.986               | 0.463              |                |
| <b>Sapien 3</b>    | 0.387               | 0.165              | 0.539          |

P values for Previous MI

|                    | <b>Evolut R/Pro</b> | <b>Acurate Neo</b> | <b>Portico</b> |
|--------------------|---------------------|--------------------|----------------|
| <b>Acurate Neo</b> | 0.590               |                    |                |
| <b>Portico</b>     | 0.489               | 0.921              |                |
| <b>Sapien 3</b>    | 0.505               | 0.996              | 0.905          |

P values for Coronary artery disease

|                    | <b>Evolut R/Pro</b> | <b>Acurate Neo</b> | <b>Portico</b> |
|--------------------|---------------------|--------------------|----------------|
| <b>Acurate Neo</b> | 0.153               |                    |                |
| <b>Portico</b>     | 0.856               | 0.321              |                |
| <b>Sapien 3</b>    | <b>0.004</b>        | <b>0.001</b>       | <b>0.027</b>   |

P values for PM or ICD

|                    | <b>Evolut R/Pro</b> | <b>Acurate Neo</b> | <b>Portico</b> |
|--------------------|---------------------|--------------------|----------------|
| <b>Acurate Neo</b> | 0.726               |                    |                |
| <b>Portico</b>     | 0.600               | 0.896              |                |
| <b>Sapien 3</b>    | <b>0.065</b>        | 0.335              | 0.409          |

P values for Atrial fibrillation

|                    | <b>Evolut R/Pro</b> | <b>Acurate Neo</b> | <b>Portico</b> |
|--------------------|---------------------|--------------------|----------------|
| <b>Acurate Neo</b> | 0.984               |                    |                |
| <b>Portico</b>     | 0.739               | 0.781              |                |
| <b>Sapien 3</b>    | <b>0.014</b>        | <b>0.061</b>       | <b>0.027</b>   |

P values for Angina

|                    | <b>Evolut R/Pro</b> | <b>Acurate Neo</b> | <b>Portico</b> |
|--------------------|---------------------|--------------------|----------------|
| <b>Acurate Neo</b> | 0.947               |                    |                |
| <b>Portico</b>     | 0.621               | 0.643              |                |
| <b>Sapien 3</b>    | <b>0.015</b>        | <b>0.072</b>       | <b>0.041</b>   |

P values for NYHA functional class III or IV

|                    | <b>Evolut R/Pro</b> | <b>Acurate Neo</b> | <b>Portico</b> |
|--------------------|---------------------|--------------------|----------------|
| <b>Acurate Neo</b> | <b>0.015</b>        |                    |                |
| <b>Portico</b>     | 0.379               | 0.010              |                |
| <b>Sapien 3</b>    | 0.277               | <b>0.004</b>       | 0.991          |

P values for STS-PROM

|                    | <b>Evolut R/Pro</b> | <b>Acurate Neo</b> | <b>Portico</b> |
|--------------------|---------------------|--------------------|----------------|
| <b>Acurate Neo</b> | 1.000               |                    |                |
| <b>Portico</b>     | <b>0.079</b>        | 1.000              |                |
| <b>Sapien 3</b>    | 1.000               | 1.000              | 0.711          |

**Supplementary Table 2. Baseline echocardiographic and computed tomography characteristics according to prosthesis implanted.**

| <b>Characteristic</b>                        | <b>Evolut<br/>R/Pro (n =<br/>750)</b> | <b>Acurate<br/>Neo (n =<br/>170)</b> | <b>Portico (n<br/>= 172)</b> | <b>Sapien 3<br/>(n = 286)</b> | <b>P value</b>   |
|----------------------------------------------|---------------------------------------|--------------------------------------|------------------------------|-------------------------------|------------------|
| <b>Echocardiographic data</b>                |                                       |                                      |                              |                               |                  |
| Mean AV gradient, mmHg                       | 48.7 ± 16.0                           | 50.2 ± 16.8                          | 46.8 ± 15.8                  | 44.3 ± 15.3                   | <b>&lt;0.001</b> |
| Maximum AV gradient,<br>mmHg                 | 80.0 ± 24.8                           | 79.9 ± 24.7                          | 74.0 ± 23.9                  | 72.3 ± 24.4                   | <b>&lt;0.001</b> |
| EOAm, cm <sup>2</sup>                        | 0.63 ± 0.18                           | 0.66 ± 0.20                          | 0.65 ± 0.22                  | 0.67 ± 0.27                   | <b>0.048</b>     |
| sPAP, mmHg                                   | 39.6 ± 13.4                           | 39.6 ± 11.4                          | 42.7 ± 14.8                  | 41.5 ± 15.2                   | <b>0.077</b>     |
| TAPSE                                        | 21.1 ± 3.9                            | 20.8 ± 3.2                           | 20.6 ± 3.0                   | 20.0 ± 2.9                    | 0.181            |
| Bicuspid AV                                  | 3.7 (20)                              | 2.5 (4)                              | 3.6 (6)                      | 7.3 (19)                      | <b>0.055</b>     |
| Moderate or greater AR                       | 7.9 (52)                              | 10.2 (15)                            | 4.3 (7)                      | 3.4 (9)                       | <b>0.018</b>     |
| Moderate or greater MR                       | 10.2 (71)                             | 11.0 (17)                            | 10.2 (17)                    | 2.6 (7)                       | <b>0.001</b>     |
| Moderate or greater TR                       | 8.8 (47)                              | 5.0 (7)                              | 6.7 (11)                     | 3.8 (9)                       | <b>0.060</b>     |
| Ejection fraction                            | 58.5 ± 11.1                           | 56.5 ± 9.6                           | 59.9 ± 9.2                   | 62.2 ± 10.2                   | <b>&lt;0.001</b> |
| LVEF <40%                                    | 6.0 (45)                              | 6.5 (11)                             | 3.5 (6)                      | 3.1 (9)                       | 0.169            |
| <b>CT data</b>                               |                                       |                                      |                              |                               |                  |
| Mean annular diameter, mm                    | 21.1 ± 1.4                            | 21.5 ± 1.3                           | 21.2 ± 1.3                   | 21.4 ± 1.0                    | <b>&lt;0.001</b> |
| Maximum diameter, mm                         | 23.6 ± 1.9                            | 23.7 ± 1.8                           | 23.9 ± 1.8                   | 24.0 ± 1.4                    | <b>0.007</b>     |
| Minimum diameter, mm                         | 18.7 ± 1.9                            | 19.3 ± 1.9                           | 18.4 ± 1.6                   | 18.9 ± 1.5                    | <b>&lt;0.001</b> |
| Annular eccentricity                         | 1.27 ± 0.17                           | 1.24 ± 0.15                          | 1.30 ± 0.16                  | 1.28 ± 0.18                   | <b>0.010</b>     |
| Mean aortic annular<br>perimeter, mm         | 67.3 ± 3.7                            | 67.4 ± 3.3                           | 67.6 ± 3.4                   | 65.0 ± 5.9                    | <b>&lt;0.001</b> |
| Mean aortic annular area,<br>mm <sup>2</sup> | 345.6 ±<br>35.3                       | 352.6 ±<br>36.0                      | 343.8 ±<br>33.1              | 362.3 ±<br>28.7               | <b>&lt;0.001</b> |
| Area-derived diameter, mm                    | 20.9 ± 1.1                            | 21.2 ± 1.1                           | 20.9 ± 1.0                   | 21.5 ± 0.9                    | <b>&lt;0.001</b> |

|                                   |            |            |            |            |                  |
|-----------------------------------|------------|------------|------------|------------|------------------|
| Perimeter-derived diameter, mm    | 21.4 ± 1.2 | 21.5 ± 1.0 | 21.5 ± 1.2 | 20.7 ± 1.9 | <b>&lt;0.001</b> |
| Severe leaflets calcification     | 18.1 (88)  | 20.6 (19)  | 8.6 (8)    | 24.5 (70)  | <b>0.005</b>     |
| Severe annular calcification      | 6.0 (24)   | 7.5 (5)    | 3.5 (5)    | 1.5 (4)    | <b>0.015</b>     |
| Severe LVOT calcification         | 5.8 (30)   | 5.1 (4)    | 2.1 (2)    | 1.4 (4)    | <b>0.009</b>     |
| LMCA distance, mm                 | 12.5 ± 2.5 | 11.7 ± 2.5 | 12.0 ± 2.8 | 12.8 ± 2.6 | <b>&lt;0.001</b> |
| RCA distance, mm                  | 14.4 ± 2.9 | 13.5 ± 3.2 | 14.5 ± 2.6 | 14.7 ± 2.5 | <b>0.006</b>     |
| Sinotubular junction diameter, mm | 25.7 ± 2.7 | 26.1 ± 3.1 | 26.3 ± 2.7 | 25.9 ± 2.4 | 0.119            |
| Sinus of Valsalva diameter, mm    | 28.8 ± 2.5 | 29.1 ± 2.9 | 29.0 ± 2.4 | 28.4 ± 2.5 | <b>0.053</b>     |
| Ascending aorta diameter, mm      | 31.5 ± 3.8 | 32.3 ± 4.1 | 32.8 ± 4.3 | 32.0 ± 3.8 | <b>0.007</b>     |
| Porcelain aorta                   | 2.7 (17)   | 2.5 (4)    | 5.4 (9)    | 11.9 (31)  | <b>&lt;0.001</b> |

Values are mean ± standard deviation or %(n). The values in **bold** represent differences between groups with p <0.100.

AV = aortic valve; AR = aortic regurgitation; EOA = effective orifice area; LMCA = left main coronary artery; LVEF = left ventricular ejection fraction; LVEDV = left ventricular end systolic volume; LVESV = left ventricular end systolic volume; LVOT = left ventricular outflow tract; MDCT = multidetector computed tomographic; MR = mitral regurgitation; sPAP = systolic pulmonary artery pressure; RCA = right coronary artery; RV = right ventricular; TR = tricuspid regurgitation; other abbreviations as in **Supplementary Table 1**.

P values for pre-procedural mean aortic valve gradient

|                    | <b>Evolut R/Pro</b> | <b>Acurate Neo</b> | <b>Portico</b> |
|--------------------|---------------------|--------------------|----------------|
| <b>Acurate Neo</b> | 1.000               |                    |                |
| <b>Portico</b>     | 0.954               | 0.307              |                |
| <b>Sapien 3</b>    | <b>0.001</b>        | <b>0.001</b>       | 0.692          |



P values for pre-procedural maximum aortic valve gradient

|                    | <b>Evolut R/Pro</b> | <b>Acurate Neo</b> | <b>Portico</b> |
|--------------------|---------------------|--------------------|----------------|
| <b>Acurate Neo</b> | 1.000               |                    |                |
| <b>Portico</b>     | <b>0.040</b>        | 0.221              |                |
| <b>Sapien 3</b>    | <b>&lt;0.001</b>    | <b>0.014</b>       | 1.000          |

P values for EOAm

|                    | <b>Evolut R/Pro</b> | <b>Acurate Neo</b> | <b>Portico</b> |
|--------------------|---------------------|--------------------|----------------|
| <b>Acurate Neo</b> | 0.796               |                    |                |
| <b>Portico</b>     | 1.000               | 1.000              |                |
| <b>Sapien 3</b>    | <b>0.061</b>        | 1.000              | 1.000          |

P values for sPAP

|                    | <b>Evolut R/Pro</b> | <b>Acurate Neo</b> | <b>Portico</b> |
|--------------------|---------------------|--------------------|----------------|
| <b>Acurate Neo</b> | 1.000               |                    |                |
| <b>Portico</b>     | 0.154               | 0.480              |                |
| <b>Sapien 3</b>    | 0.583               | 1.000              | 1.000          |

P values for TAPSE

|                    | <b>Evolut R/Pro</b> | <b>Acurate Neo</b> | <b>Portico</b> |
|--------------------|---------------------|--------------------|----------------|
| <b>Acurate Neo</b> | 1.000               |                    |                |
| <b>Portico</b>     | 1.000               | 1.000              |                |
| <b>Sapien 3</b>    | 0.216               | 1.000              | 1.000          |

P values for Bicuspid aorta

|                    | <b>Evolut R/Pro</b> | <b>Acurate Neo</b> | <b>Portico</b> |
|--------------------|---------------------|--------------------|----------------|
| <b>Acurate Neo</b> | 0.481               |                    |                |
| <b>Portico</b>     | 0.943               | 0.586              |                |
| <b>Sapien 3</b>    | <b>0.025</b>        | <b>0.037</b>       | 0.106          |

P values for Moderate or greater AR

|                    | <b>Evolut R/Pro</b> | <b>Acurate Neo</b> | <b>Portico</b> |
|--------------------|---------------------|--------------------|----------------|
| <b>Acurate Neo</b> | 0.353               |                    |                |
| <b>Portico</b>     | 0.121               | <b>0.046</b>       |                |
| <b>Sapien 3</b>    | <b>0.015</b>        | <b>0.005</b>       | 0.638          |

P values for Moderate or greater MR

|                    | <b>Evolut R/Pro</b> | <b>Acurate Neo</b> | <b>Portico</b> |
|--------------------|---------------------|--------------------|----------------|
| <b>Acurate Neo</b> | 0.790               |                    |                |
| <b>Portico</b>     | 0.999               | 0.833              |                |
| <b>Sapien 3</b>    | <b>&lt;0.001</b>    | <b>&lt;0.001</b>   | <b>0.001</b>   |

P values for Moderate or greater TR

|                    | <b>Evolut R/Pro</b> | <b>Acurate Neo</b> | <b>Portico</b> |
|--------------------|---------------------|--------------------|----------------|
| <b>Acurate Neo</b> | 0.141               |                    |                |
| <b>Portico</b>     | 0.386               | 0.540              |                |
| <b>Sapien 3</b>    | <b>0.013</b>        | 0.572              | 0.192          |

P values for Ejection fraction

|                    | <b>Evolut R/Pro</b> | <b>Acurate Neo</b> | <b>Portico</b> |
|--------------------|---------------------|--------------------|----------------|
| <b>Acurate Neo</b> | 0.189               |                    |                |
| <b>Portico</b>     | 0.641               | <b>0.019</b>       |                |
| <b>Sapien 3</b>    | <b>&lt;0.001</b>    | <b>&lt;0.001</b>   | 0.133          |

P values for LVEF <40%

|                    | <b>Evolut R/Pro</b> | <b>Acurate Neo</b> | <b>Portico</b> |
|--------------------|---------------------|--------------------|----------------|
| <b>Acurate Neo</b> | 0.817               |                    |                |
| <b>Portico</b>     | 0.194               | 0.205              |                |
| <b>Sapien 3</b>    | <b>0.065</b>        | <b>0.094</b>       | 0.842          |

P values for mean aortic annulus diameter

|                    | <b>Evolut R/Pro</b> | <b>Acurate Neo</b> | <b>Portico</b> |
|--------------------|---------------------|--------------------|----------------|
| <b>Acurate Neo</b> | <b>0.014</b>        |                    |                |
| <b>Portico</b>     | 1.000               | 0.123              |                |
| <b>Sapien 3</b>    | <b>0.006</b>        | 1.000              | 0.151          |

P values for maximum aortic annulus diameter

|                    | <b>Evolut R/Pro</b> | <b>Acurate Neo</b> | <b>Portico</b> |
|--------------------|---------------------|--------------------|----------------|
| <b>Acurate Neo</b> | 1.000               |                    |                |
| <b>Portico</b>     | 0.287               | 1.000              |                |
| <b>Sapien 3</b>    | <b>0.006</b>        | 0.790              | 1.000          |

P values for minimum aortic annulus diameter

|                    | <b>Evolut R/Pro</b> | <b>Acurate Neo</b> | <b>Portico</b> |
|--------------------|---------------------|--------------------|----------------|
| <b>Acurate Neo</b> | <b>0.002</b>        |                    |                |
| <b>Portico</b>     | 0.533               | <b>&lt;0.001</b>   |                |
| <b>Sapien 3</b>    | 0.725               | 0.208              | <b>0.052</b>   |

P values for Mean aortic annular area

|                    | <b>Evolut R/Pro</b> | <b>Acurate Neo</b> | <b>Portico</b>   |
|--------------------|---------------------|--------------------|------------------|
| <b>Acurate Neo</b> | 0.110               |                    |                  |
| <b>Portico</b>     | 1.000               | 0.107              |                  |
| <b>Sapien 3</b>    | <b>&lt;0.001</b>    | <b>0.021</b>       | <b>&lt;0.001</b> |

P values for Mean aortic annular perimeter

|                    | <b>Evolut R/Pro</b> | <b>Acurate Neo</b> | <b>Portico</b>   |
|--------------------|---------------------|--------------------|------------------|
| <b>Acurate Neo</b> | 1.000               |                    |                  |
| <b>Portico</b>     | 1.000               | 1.000              |                  |
| <b>Sapien 3</b>    | <b>&lt;0.001</b>    | <b>&lt;0.001</b>   | <b>&lt;0.001</b> |

P values for LMCA distance

|                    | <b>Evolut R/Pro</b> | <b>Acurate Neo</b> | <b>Portico</b> |
|--------------------|---------------------|--------------------|----------------|
| <b>Acurate Neo</b> | <b>0.035</b>        |                    |                |
| <b>Portico</b>     | 0.285               | 1.000              |                |
| <b>Sapien 3</b>    | 0.541               | <b>0.001</b>       | <b>0.014</b>   |

P values for RCA distance

|                    | <b>Evolut R/Pro</b> | <b>Acurate Neo</b> | <b>Portico</b> |
|--------------------|---------------------|--------------------|----------------|
| <b>Acurate Neo</b> | <b>0.040</b>        |                    |                |
| <b>Portico</b>     | 1.000               | <b>0.081</b>       |                |
| <b>Sapien 3</b>    | 0.980               | <b>0.003</b>       | 1.000          |

P values for Sinotubular junction diameter

|                    | <b>Evolut R/Pro</b> | <b>Acurate Neo</b> | <b>Portico</b> |
|--------------------|---------------------|--------------------|----------------|
| <b>Acurate Neo</b> | 1.000               |                    |                |
| <b>Portico</b>     | 0.154               | 1.000              |                |
| <b>Sapien 3</b>    | 1.000               | 1.000              | 0.997          |

P values for Sinus of Valsalva diameter

|                    | <b>Evolut R/Pro</b> | <b>Acurate Neo</b> | <b>Portico</b> |
|--------------------|---------------------|--------------------|----------------|
| <b>Acurate Neo</b> | 1.000               |                    |                |
| <b>Portico</b>     | 1.000               | 1.000              |                |
| <b>Sapien 3</b>    | 0.322               | 0.205              | 0.170          |

P values for Ascending aorta diameter

|                    | <b>Evolut R/Pro</b> | <b>Acurate Neo</b> | <b>Portico</b> |
|--------------------|---------------------|--------------------|----------------|
| <b>Acurate Neo</b> | 0.658               |                    |                |
| <b>Portico</b>     | <b>0.006</b>        | 1.000              |                |
| <b>Sapien 3</b>    | 0.752               | 1.000              | 0.296          |

P values for Porcelain aorta

|                    | <b>Evolut R/Pro</b> | <b>Acurate Neo</b> | <b>Portico</b> |
|--------------------|---------------------|--------------------|----------------|
| <b>Acurate Neo</b> | 1.000               |                    |                |
| <b>Portico</b>     | <b>0.081</b>        | 0.259              |                |
| <b>Sapien 3</b>    | <b>&lt;0.001</b>    | <b>&lt;0.001</b>   | <b>0.026</b>   |

P values for Area-derived diameter

|                    | <b>Evolut R/Pro</b> | <b>Acurate Neo</b> | <b>Portico</b>   |
|--------------------|---------------------|--------------------|------------------|
| <b>Acurate Neo</b> | 0.117               |                    |                  |
| <b>Portico</b>     | 1.000               | 0.124              |                  |
| <b>Sapien 3</b>    | <b>&lt;0.001</b>    | <b>0.020</b>       | <b>&lt;0.001</b> |

P values for Perimeter-derived diameter

|                    | <b>Evolut R/Pro</b> | <b>Acurate Neo</b> | <b>Portico</b>   |
|--------------------|---------------------|--------------------|------------------|
| <b>Acurate Neo</b> | 1.000               |                    |                  |
| <b>Portico</b>     | 1.000               | 1.000              |                  |
| <b>Sapien 3</b>    | <b>&lt;0.001</b>    | <b>&lt;0.001</b>   | <b>&lt;0.001</b> |

P values for Severe leaflets calcification

|                    | <b>Evolut R/Pro</b> | <b>Acurate Neo</b> | <b>Portico</b> |
|--------------------|---------------------|--------------------|----------------|
| <b>Acurate Neo</b> | 0.558               |                    |                |
| <b>Portico</b>     | <b>0.024</b>        | <b>0.020</b>       |                |
| <b>Sapien 3</b>    | <b>0.033</b>        | 0.452              | <b>0.001</b>   |

P values for Severe annular calcification

|                    | <b>Evolut R/Pro</b> | <b>Acurate Neo</b> | <b>Portico</b> |
|--------------------|---------------------|--------------------|----------------|
| <b>Acurate Neo</b> | 0.587               |                    |                |
| <b>Portico</b>     | 0.384               | 0.297              |                |
| <b>Sapien 3</b>    | <b>0.005</b>        | <b>0.020</b>       | 0.288          |

P values for Severe LVOT calcification

|                    | <b>Evolut R/Pro</b> | <b>Acurate Neo</b> | <b>Portico</b> |
|--------------------|---------------------|--------------------|----------------|
| <b>Acurate Neo</b> | 1.000               |                    |                |
| <b>Portico</b>     | 0.209               | 0.410              |                |
| <b>Sapien 3</b>    | <b>0.003</b>        | <b>0.070</b>       | 0.646          |

P values for Annular eccentricity

|                    | <b>Evolut R/Pro</b> | <b>Acurate Neo</b> | <b>Portico</b> |
|--------------------|---------------------|--------------------|----------------|
| <b>Acurate Neo</b> | 0.196               |                    |                |
| <b>Portico</b>     | 0.211               | <b>0.005</b>       |                |
| <b>Sapien 3</b>    | 1.000               | 0.125              | 0.874          |

**Supplementary Table 3. Procedural characteristics according to prosthesis implanted.**

| Characteristic               | Evolut R/Pro (n = 750) | Acurate Neo (n = 170) | Portico (n = 172) | Sapien 3 (n = 286) | P value          |
|------------------------------|------------------------|-----------------------|-------------------|--------------------|------------------|
| Valve size 25 mm or less     | 16.1 (121)             | 95.3 (162)            | 88.9 (153)        | 98.9 (283)         | <b>&lt;0.001</b> |
| Oversizing by perimeter      | 19.2 ± 6.3             | 9.7 ± 5.8             | 14.1 ± 5.8        | 9.5 ± 11.4         | <b>&lt;0.001</b> |
| Oversizing by perimeter ≥15% | 75.5 (566)             | 14.7 (25)             | 43.6 (75)         | 27.6 (79)          | <b>&lt;0.001</b> |
| Oversizing by area           | 50.4 ± 16.0            | 25.4 ± 12.8           | 39.4 ± 13.3       | 11.9 ± 9.4         | <b>&lt;0.001</b> |
| Oversizing by area ≥15%      | 99.6 (747)             | 81.8 (139)            | 98.8 (170)        | 28.7 (82)          | <b>&lt;0.001</b> |
| Oversizing ≥15%              | 75.5 (566)             | 14.7 (25)             | 43.6 (75)         | 28.7 (82)          | <b>&lt;0.001</b> |
| Pre-dilation                 | 33.6 (250)             | 65.7 (111)            | 70.0 (120)        | 32.9 (92)          | <b>&lt;0.001</b> |
| Post-dilation                | 30.8 (230)             | 36.5 (62)             | 38.2 (65)         | 8.2 (23)           | <b>&lt;0.001</b> |
| Annular rupture              | 0.3 (2)                | 0                     | 0.6 (1)           | 0.3 (1)            | 0.826            |

Values are mean ± standard deviation or %(n). The values in **bold** represent differences between groups with p <0.100. Oversizing ≥15% refers to oversizing by perimeter ≥15% for self-expandable valves and oversizing by area ≥15% for balloon-expandable valves.

P values for Valve size 25 mm or less

|                    | Evolut R/Pro     | Acurate Neo  | Portico          |
|--------------------|------------------|--------------|------------------|
| <b>Acurate Neo</b> | <b>&lt;0.001</b> |              |                  |
| <b>Portico</b>     | <b>&lt;0.001</b> | <b>0.030</b> |                  |
| <b>Sapien 3</b>    | <b>&lt;0.001</b> | <b>0.023</b> | <b>&lt;0.001</b> |

P values for Oversizing by perimeter ≥15%

|                    | Evolut R/Pro     | Acurate Neo      | Portico          |
|--------------------|------------------|------------------|------------------|
| <b>Acurate Neo</b> | <b>&lt;0.001</b> |                  |                  |
| <b>Portico</b>     | <b>&lt;0.001</b> | <b>&lt;0.001</b> |                  |
| <b>Sapien 3</b>    | <b>&lt;0.001</b> | <b>0.001</b>     | <b>&lt;0.001</b> |

P values for Oversizing by perimeter

|                    | <b>Evolut R/Pro</b> | <b>Acurate Neo</b> | <b>Portico</b>   |
|--------------------|---------------------|--------------------|------------------|
| <b>Acurate Neo</b> | <b>&lt;0.001</b>    |                    |                  |
| <b>Portico</b>     | <b>&lt;0.001</b>    | <b>&lt;0.001</b>   |                  |
| <b>Sapien 3</b>    | <b>&lt;0.001</b>    | 1.000              | <b>&lt;0.001</b> |

P values for Oversizing by area  $\geq 15\%$

|                    | <b>Evolut R/Pro</b> | <b>Acurate Neo</b> | <b>Portico</b>   |
|--------------------|---------------------|--------------------|------------------|
| <b>Acurate Neo</b> | <b>&lt;0.001</b>    |                    |                  |
| <b>Portico</b>     | 0.235               | <b>&lt;0.001</b>   |                  |
| <b>Sapien 3</b>    | <b>&lt;0.001</b>    | <b>&lt;0.001</b>   | <b>&lt;0.001</b> |

P values for Oversizing by area

|                    | <b>Evolut R/Pro</b> | <b>Acurate Neo</b> | <b>Portico</b>   |
|--------------------|---------------------|--------------------|------------------|
| <b>Acurate Neo</b> | <b>&lt;0.001</b>    |                    |                  |
| <b>Portico</b>     | <b>&lt;0.001</b>    | <b>&lt;0.001</b>   |                  |
| <b>Sapien 3</b>    | <b>&lt;0.001</b>    | <b>&lt;0.001</b>   | <b>&lt;0.001</b> |

P values for Oversizing  $\geq 15\%$

|                    | <b>Evolut R/Pro</b> | <b>Acurate Neo</b> | <b>Portico</b> |
|--------------------|---------------------|--------------------|----------------|
| <b>Acurate Neo</b> | <b>&lt;0.001</b>    |                    |                |
| <b>Portico</b>     | <b>&lt;0.001</b>    | <b>&lt;0.001</b>   |                |
| <b>Sapien 3</b>    | <b>&lt;0.001</b>    | <b>0.001</b>       | <b>0.001</b>   |

P values for Predilation

|                    | <b>Evolut R/Pro</b> | <b>Acurate Neo</b> | <b>Portico</b>   |
|--------------------|---------------------|--------------------|------------------|
| <b>Acurate Neo</b> | <b>&lt;0.001</b>    |                    |                  |
| <b>Portico</b>     | <b>&lt;0.001</b>    | 0.420              |                  |
| <b>Sapien 3</b>    | 0.832               | <b>&lt;0.001</b>   | <b>&lt;0.001</b> |



P values for Postdilation

|                    | <b>Evolut R/Pro</b> | <b>Acurate Neo</b> | <b>Portico</b>   |
|--------------------|---------------------|--------------------|------------------|
| <b>Acurate Neo</b> | 0.154               |                    |                  |
| <b>Portico</b>     | <b>0.062</b>        | 0.737              |                  |
| <b>Sapien 3</b>    | <b>&lt;0.001</b>    | <b>&lt;0.001</b>   | <b>&lt;0.001</b> |

P values for Annular rupture

|                    | <b>Evolut R/Pro</b> | <b>Acurate Neo</b> | <b>Portico</b> |
|--------------------|---------------------|--------------------|----------------|
| <b>Acurate Neo</b> | 1.000               |                    |                |
| <b>Portico</b>     | 0.481               | 1.000              |                |
| <b>Sapien 3</b>    | 1.000               | 1.000              | 1.000          |

**Supplementary Table 4. Standardised mean differences (SMDs) of the covariates used for propensity score modelling before and after inverse probability of treatment weight (IPTW) adjustment.**

| Covariates                     | SAV vs. IAV       |                  | SEV vs. BEV       |                  |
|--------------------------------|-------------------|------------------|-------------------|------------------|
|                                | Before adjustment | After adjustment | Before adjustment | After adjustment |
| Age                            | 17.0              | -0.4             | 14.8              | 1.2              |
| BMI                            | -9.6              | 0.8              | 0.2               | 8.4              |
| Female                         | 8.6               | 0.9              | 3.6               | 1.6              |
| Hypertension                   | -7.2              | -0.3             | -5.6              | 2.4              |
| COPD                           | -4.3              | -0.6             | -16.4             | 1.7              |
| Cerebrovascular disease        | -18.8             | -0.4             | -19.5             | 1.8              |
| CAD                            | -13.3             | -0.04            | -20.1             | 1.5              |
| Previous PM/ICD                | -16.9             | -0.4             | -19.2             | 2.3              |
| NYHA Class III/IV              | -9.6              | -0.5             | -2.1              | 1.9              |
| STS-PROM                       | 3.2               | -0.7             | -6.3              | -2.3             |
| Preprocedural mean AV gradient | 15.7              | 1.2              | 1.6               | 4.4              |
| LVEF                           | -21.2             | 2.7              | -28.2             | 7.4              |
| AV annular perimeter           | 36.8              | -1.0             | 61.0              | -11.2            |

Values are in %. Abbreviations as in Supplementary Table 5.

**Supplementary Table 5. Prediction of severe prosthesis-patient mismatch using doubly-robust inverse probability of treatment weight (IPTW)-adjusted logistic regression analysis.**

| <b>SAV vs. IAV</b>                       |                                                |                |
|------------------------------------------|------------------------------------------------|----------------|
| <b>Clinical characteristics</b>          | <b>Doubly-robust IPTW-adjusted OR (95% CI)</b> | <b>P value</b> |
| Atrial fibrillation                      | 0.33 (0.13-0.88)                               | <b>0.027</b>   |
| Annular perimeter, mm                    | 0.25 (0.10-0.61)                               | <b>0.003</b>   |
| Bicuspid AV                              | 0.27 (0.11-0.65)                               | <b>0.004</b>   |
| Moderate/severe AV leaflet calcification | 0.28 (0.11-0.72)                               | <b>0.008</b>   |
| Any AV annular calcification             | 0.32 (0.12-0.85)                               | <b>0.022</b>   |
| Any LVOT calcification                   | 0.30 (0.11-0.83)                               | <b>0.021</b>   |
| <b>SEV vs. BEV</b>                       |                                                |                |
| <b>Clinical characteristics</b>          | <b>Doubly-robust IPTW-adjusted OR (95% CI)</b> | <b>P value</b> |
| Atrial fibrillation                      | 0.44 (0.18-1.08)                               | <b>0.073</b>   |
| Annular perimeter, mm                    | 0.40 (0.17-0.91)                               | <b>0.029</b>   |
| Bicuspid AV                              | 0.40 (0.17-0.92)                               | <b>0.031</b>   |
| Moderate/severe AV leaflet calcification | 0.37 (0.15-0.90)                               | <b>0.029</b>   |
| Any AV annular calcification             | 0.46 (0.19-1.10)                               | <b>0.080</b>   |
| Any LVOT calcification                   | 0.42 (0.16-1.07)                               | <b>0.070</b>   |

AV = aortic valve; BEV = balloon-expandable valve; CI = confidence interval; IAV = intra-annular valve; IPTW = inverse probability of treatment weighting; LVOT = left ventricular outflow tract; SAV = supra-annular valve; SEV = self-expandable valve.

The values in bold represent differences between groups with  $p < 0.100$ .

**Supplementary Table 6. Post-procedural characteristics and follow-up according to prosthesis implanted.**

| <b>Characteristic</b>                        | <b>Evolut<br/>R/Pro (n<br/>= 750)</b> | <b>Acurate<br/>Neo (n =<br/>170)</b> | <b>Portico (n =<br/>172)</b> | <b>Sapien 3<br/>(n = 286)</b> | <b>P value</b>   |
|----------------------------------------------|---------------------------------------|--------------------------------------|------------------------------|-------------------------------|------------------|
| <b>Pre-discharge</b>                         |                                       |                                      |                              |                               |                  |
| Any vascular complication                    | 12.1 (90)                             | 20.2 (34)                            | 17.4 (30)                    | 13.3 (38)                     | <b>0.025</b>     |
| Major vascular complication                  | 4.0 (30)                              | 5.9 (10)                             | 5.2 (9)                      | 5.6 (16)                      | 0.598            |
| Need for second valve<br>implantation        | 2.1 (16)                              | 0                                    | 3.5 (6)                      | 0.3 (1)                       | <b>0.009</b>     |
| Mean AV gradient, mmHg                       | 7.5 ± 3.8                             | 8.7 ± 4.4                            | 9.2 ± 4.5                    | 13.6 ± 4.7                    | <b>&lt;0.001</b> |
| Maximum AV gradient,<br>mmHg                 | 14.1 ± 6.4                            | 16.3 ± 8.2                           | 17.1 ± 9.0                   | 24.8 ± 7.7                    | <b>&lt;0.001</b> |
| EOA, cm <sup>2</sup>                         | 1.71 ±<br>0.48                        | 1.91 ± 0.58                          | 1.63 ± 0.43                  | 1.41 ±<br>0.29                | <b>&lt;0.001</b> |
| Indexed EOA, cm <sup>2</sup> /m <sup>2</sup> | 1.09 ±<br>0.30                        | 1.18 ±<br>0.36                       | 0.97 ± 0.28                  | 0.84 ±<br>0.19                | <b>&lt;0.001</b> |
| Any PPM (non BMI-adjusted)                   | 17.1 (47)                             | 15.5 (9)                             | 35.9 (28)                    | 58.3 (127)                    | <b>&lt;0.001</b> |
| Any PPM                                      | 14.4 (36)                             | 13.8 (8)                             | 29.5 (23)                    | 49.5 (108)                    | <b>&lt;0.001</b> |
| Moderate PPM (non BMI-<br>adjusted)          | 13.1 (36)                             | 10.3 (6)                             | 24.4 (19)                    | 44.0 (96)                     | <b>&lt;0.001</b> |
| Moderate PPM                                 | 9.8 (27)                              | 10.3 (6)                             | 20.5 (16)                    | 40.8 (89)                     | <b>&lt;0.001</b> |
| Severe PPM (non BMI-<br>adjusted)            | 4.0 (11)                              | 5.2 (3)                              | 11.5 (9)                     | 14.2 (31)                     | <b>&lt;0.001</b> |
| Severe PPM                                   | 3.6 (10)                              | 3.4 (2)                              | 9.0 (7)                      | 8.7 (19)                      | <b>0.058</b>     |
| More than mild PVL                           | 9.9 (58)                              | 11.2 (15)                            | 19.0 (27)                    | 2.6 (7)                       | <b>&lt;0.001</b> |
| More than moderate PVL                       | 0.8 (5)                               | 4.5 (6)                              | 0.7 (1)                      | 0                             | <b>0.002</b>     |
| PPI                                          | 13.9 (103)                            | 10.2 (17)                            | 15.1 (26)                    | 8.1 (23)                      | <b>0.039</b>     |

|                          |          |          |           |           |              |
|--------------------------|----------|----------|-----------|-----------|--------------|
| BARC major bleeding      | 6.9 (52) | 4.1 (7)  | 2.9 (5)   | 5.9 (17)  | 0.166        |
| <b>Follow-up</b>         |          |          |           |           |              |
| All-cause mortality      | 9.8 (65) | 7.9 (11) | 11.2 (19) | 12.3 (34) | 0.482        |
| Cardiovascular mortality | 2.7 (18) | 2.9 (4)  | 5.4 (9)   | 4.0 (11)  | 0.332        |
| Myocardial infarction    | 1.0 (6)  | 0.8 (1)  | 2.7 (3)   | 0.7 (2)   | 0.367        |
| TIA/stroke               | 4.4 (26) | 1.5 (2)  | 1.3 (1)   | 2.6 (7)   | 0.254        |
| Acute kidney injury      | 2.4 (12) | 8.1 (7)  | 4.8 (3)   | 1.9 (5)   | <b>0.020</b> |
| Hospitalization for HF   | 6.0 (35) | 5.3 (7)  | 7.8 (6)   | 6.6 (17)  | 0.896        |

Values are mean  $\pm$  standard deviation or %(n). The values in **bold** represent differences between groups with  $p < 0.100$ .

BARC = Bleeding Academic Research Consortium; HF = heart failure; PPM = prosthesis patient mismatch; PPI = permanent pacemaker implantation; PVL = paravalvular leak; TIA = transient ischemic attack; other abbreviations as in **Tables 1 and 2**.

P values for Any vascular complication

|                    | <b>Evolut R/Pro</b> | <b>Acurate Neo</b> | <b>Portico</b> |
|--------------------|---------------------|--------------------|----------------|
| <b>Acurate Neo</b> | <b>0.006</b>        |                    |                |
| <b>Portico</b>     | <b>0.064</b>        | 0.510              |                |
| <b>Sapien 3</b>    | 0.620               | <b>0.050</b>       | 0.226          |

P values for Major vascular complication

|                    | <b>Evolut R/Pro</b> | <b>Acurate Neo</b> | <b>Portico</b> |
|--------------------|---------------------|--------------------|----------------|
| <b>Acurate Neo</b> | 0.277               |                    |                |
| <b>Portico</b>     | 0.489               | 0.773              |                |
| <b>Sapien 3</b>    | 0.283               | 0.874              | 0.869          |

P values for Need of second valve implantation

|                    | <b>Evolut R/Pro</b> | <b>Acurate Neo</b> | <b>Portico</b> |
|--------------------|---------------------|--------------------|----------------|
| <b>Acurate Neo</b> | <b>0.054</b>        |                    |                |
| <b>Portico</b>     | 0.296               | <b>0.030</b>       |                |
| <b>Sapien 3</b>    | <b>0.053</b>        | 1.000              | <b>0.013</b>   |

P values for post-procedural mean aortic valve gradient

|                    | <b>Evolut R/Pro</b> | <b>Acurate Neo</b> | <b>Portico</b>   |
|--------------------|---------------------|--------------------|------------------|
| <b>Acurate Neo</b> | <b>0.020</b>        |                    |                  |
| <b>Portico</b>     | <b>&lt;0.001</b>    | 1.000              |                  |
| <b>Sapien 3</b>    | <b>&lt;0.001</b>    | <b>&lt;0.001</b>   | <b>&lt;0.001</b> |

P values for post-procedural maximal aortic valve gradient

|                    | <b>Evolut R/Pro</b> | <b>Acurate Neo</b> | <b>Portico</b>   |
|--------------------|---------------------|--------------------|------------------|
| <b>Acurate Neo</b> | <b>0.007</b>        |                    |                  |
| <b>Portico</b>     | <b>0.003</b>        | 1.000              |                  |
| <b>Sapien 3</b>    | <b>&lt;0.001</b>    | <b>&lt;0.001</b>   | <b>&lt;0.001</b> |

P values for post-procedural EOA

|                    | <b>Evolut R/Pro</b> | <b>Acurate Neo</b> | <b>Portico</b>   |
|--------------------|---------------------|--------------------|------------------|
| <b>Acurate Neo</b> | <b>0.006</b>        |                    |                  |
| <b>Portico</b>     | 0.860               | <b>0.001</b>       |                  |
| <b>Sapien 3</b>    | <b>&lt;0.001</b>    | <b>&lt;0.001</b>   | <b>&lt;0.001</b> |

P values for post-procedural EOAI

|                    | <b>Evolut R/Pro</b> | <b>Acurate Neo</b> | <b>Portico</b> |
|--------------------|---------------------|--------------------|----------------|
| <b>Acurate Neo</b> | 0.166               |                    |                |
| <b>Portico</b>     | <b>0.004</b>        | <b>&lt;0.001</b>   |                |
| <b>Sapien 3</b>    | <b>&lt;0.001</b>    | <b>&lt;0.001</b>   | <b>0.002</b>   |

P values for any non BMI-adjusted PPM

|                    | <b>Evolut R/Pro</b> | <b>Acurate Neo</b> | <b>Portico</b> |
|--------------------|---------------------|--------------------|----------------|
| <b>Acurate Neo</b> | 0.762               |                    |                |
| <b>Portico</b>     | <b>&lt;0.001</b>    | <b>0.008</b>       |                |
| <b>Sapien 3</b>    | <b>&lt;0.001</b>    | <b>&lt;0.001</b>   | <b>0.001</b>   |

P values for any PPM

|                    | <b>Evolut R/Pro</b> | <b>Acurate Neo</b> | <b>Portico</b> |
|--------------------|---------------------|--------------------|----------------|
| <b>Acurate Neo</b> | 0.953               |                    |                |
| <b>Portico</b>     | <b>0.001</b>        | <b>0.031</b>       |                |
| <b>Sapien 3</b>    | <b>&lt;0.001</b>    | <b>&lt;0.001</b>   | <b>0.002</b>   |

P values for moderate non BMI-adjusted PPM

|                    | <b>Evolut R/Pro</b> | <b>Acurate Neo</b> | <b>Portico</b> |
|--------------------|---------------------|--------------------|----------------|
| <b>Acurate Neo</b> | 0.561               |                    |                |
| <b>Portico</b>     | <b>0.016</b>        | <b>0.037</b>       |                |
| <b>Sapien 3</b>    | <b>&lt;0.001</b>    | <b>&lt;0.001</b>   | <b>0.002</b>   |

P values for moderate PPM

|                    | <b>Evolut R/Pro</b> | <b>Acurate Neo</b> | <b>Portico</b> |
|--------------------|---------------------|--------------------|----------------|
| <b>Acurate Neo</b> | 0.910               |                    |                |
| <b>Portico</b>     | <b>0.011</b>        | 0.111              |                |
| <b>Sapien 3</b>    | <b>&lt;0.001</b>    | <b>&lt;0.001</b>   | <b>0.001</b>   |

P values for severe non BMI-adjusted PPM

|                    | <b>Evolut R/Pro</b> | <b>Acurate Neo</b> | <b>Portico</b> |
|--------------------|---------------------|--------------------|----------------|
| <b>Acurate Neo</b> | 0.718               |                    |                |
| <b>Portico</b>     | <b>0.011</b>        | 0.235              |                |
| <b>Sapien 3</b>    | <b>&lt;0.001</b>    | <b>0.072</b>       | 0.700          |

P values for severe PPM

|                    | <b>Evolut R/Pro</b> | <b>Acurate Neo</b> | <b>Portico</b> |
|--------------------|---------------------|--------------------|----------------|
| <b>Acurate Neo</b> | 1.000               |                    |                |
| <b>Portico</b>     | <b>0.053</b>        | 0.300              |                |
| <b>Sapien 3</b>    | <b>0.018</b>        | 0.265              | 0.945          |

P values for PPI

|                    | <b>Evolut R/Pro</b> | <b>Acurate Neo</b> | <b>Portico</b> |
|--------------------|---------------------|--------------------|----------------|
| <b>Acurate Neo</b> | 0.200               |                    |                |
| <b>Portico</b>     | 0.680               | 0.172              |                |
| <b>Sapien 3</b>    | <b>0.011</b>        | 0.446              | <b>0.018</b>   |

P values for more than moderate PVL

|                    | <b>Evolut R/Pro</b> | <b>Acurate Neo</b> | <b>Portico</b> |
|--------------------|---------------------|--------------------|----------------|
| <b>Acurate Neo</b> | <b>0.008</b>        |                    |                |
| <b>Portico</b>     | 1.000               | <b>0.060</b>       |                |
| <b>Sapien 3</b>    | 0.332               | <b>0.001</b>       | 0.346          |

P values for more than mild PVL

|                    | <b>Evolut R/Pro</b> | <b>Acurate Neo</b> | <b>Portico</b>   |
|--------------------|---------------------|--------------------|------------------|
| <b>Acurate Neo</b> | 0.645               |                    |                  |
| <b>Portico</b>     | <b>0.002</b>        | <b>0.071</b>       |                  |
| <b>Sapien 3</b>    | <b>&lt;0.001</b>    | <b>&lt;0.001</b>   | <b>&lt;0.001</b> |

P values for BARC major bleeding

|                    | <b>Evolut R/Pro</b> | <b>Acurate Neo</b> | <b>Portico</b> |
|--------------------|---------------------|--------------------|----------------|
| <b>Acurate Neo</b> | 0.176               |                    |                |
| <b>Portico</b>     | <b>0.053</b>        | 0.572              |                |
| <b>Sapien 3</b>    | 0.568               | 0.517              | 0.178          |

P values for All-cause mortality

|                    | <b>Evolut R/Pro</b> | <b>Acurate Neo</b> | <b>Portico</b> |
|--------------------|---------------------|--------------------|----------------|
| <b>Acurate Neo</b> | 0.478               |                    |                |
| <b>Portico</b>     | 0.575               | 0.317              |                |
| <b>Sapien 3</b>    | 0.250               | 0.166              | 0.734          |



P values for Cardiovascular mortality

|                    | <b>Evolut R/Pro</b> | <b>Acurate Neo</b> | <b>Portico</b> |
|--------------------|---------------------|--------------------|----------------|
| <b>Acurate Neo</b> | 1.000               |                    |                |
| <b>Portico</b>     | <b>0.024</b>        | 0.141              |                |
| <b>Sapien 3</b>    | 0.317               | 0.782              | 0.473          |

P values for Myocardial infarction

|                    | <b>Evolut R/Pro</b> | <b>Acurate Neo</b> | <b>Portico</b> |
|--------------------|---------------------|--------------------|----------------|
| <b>Acurate Neo</b> | 1.000               |                    |                |
| <b>Portico</b>     | 0.160               | 0.346              |                |
| <b>Sapien 3</b>    | 1.000               | 1.000              | 0.143          |

P values for TIA/stroke

|                    | <b>Evolut R/Pro</b> | <b>Acurate Neo</b> | <b>Portico</b> |
|--------------------|---------------------|--------------------|----------------|
| <b>Acurate Neo</b> | 0.140               |                    |                |
| <b>Portico</b>     | 0.348               | 1.000              |                |
| <b>Sapien 3</b>    | 0.195               | 0.724              | 1.000          |

P values for Acute kidney injury

|                    | <b>Evolut R/Pro</b> | <b>Acurate Neo</b> | <b>Portico</b> |
|--------------------|---------------------|--------------------|----------------|
| <b>Acurate Neo</b> | <b>0.005</b>        |                    |                |
| <b>Portico</b>     | 0.220               | 0.521              |                |
| <b>Sapien 3</b>    | 0.799               | <b>0.011</b>       | 0.176          |

P values for Hospitalization for HF

|                    | <b>Evolut R/Pro</b> | <b>Acurate Neo</b> | <b>Portico</b> |
|--------------------|---------------------|--------------------|----------------|
| <b>Acurate Neo</b> | 0.775               |                    |                |
| <b>Portico</b>     | 0.538               | 0.481              |                |
| <b>Sapien 3</b>    | 0.751               | 0.636              | 0.708          |

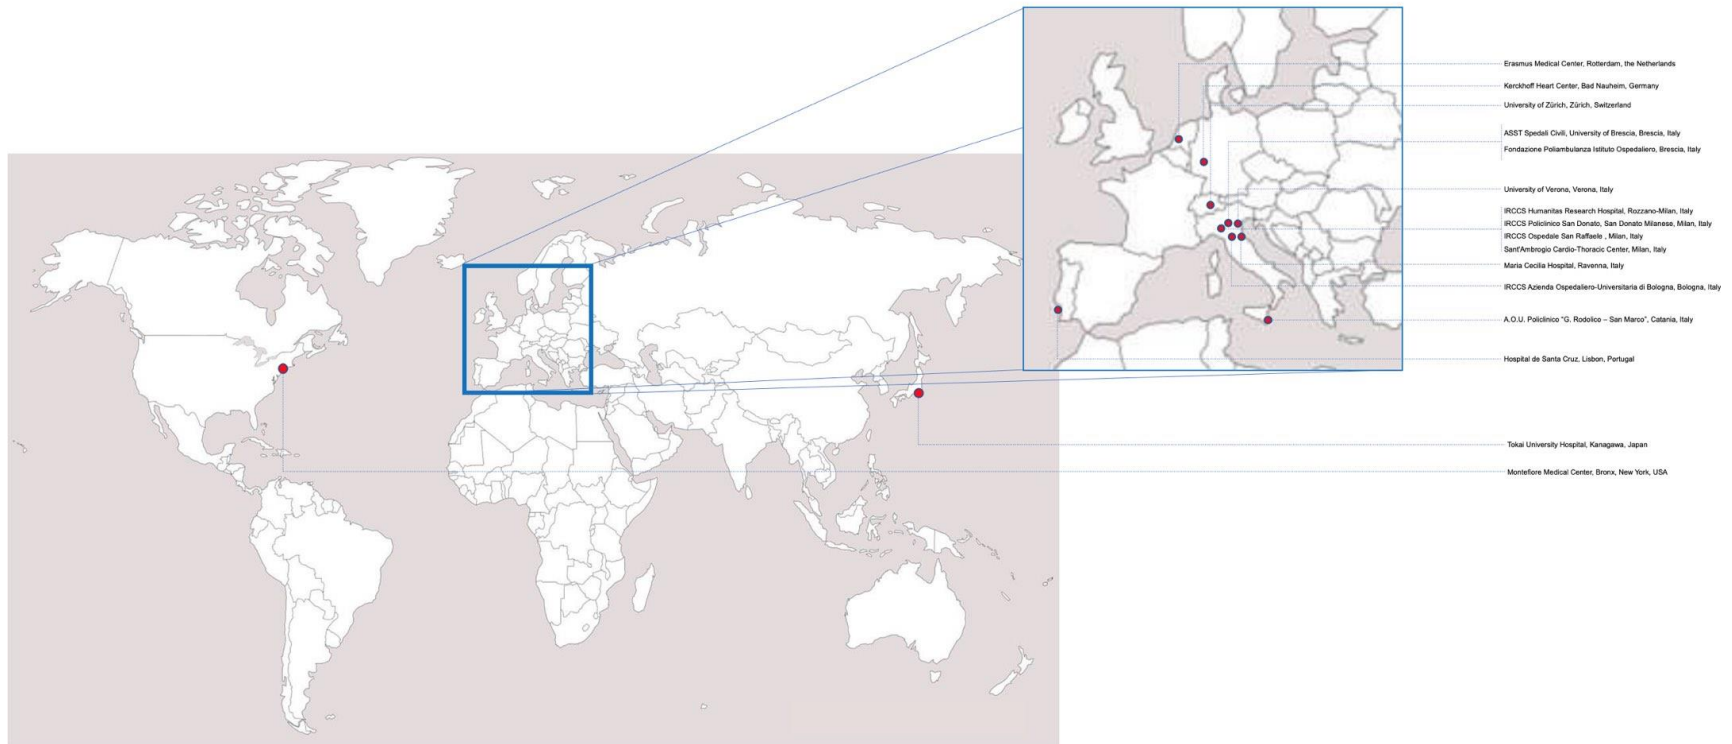

**Supplementary Figure 1.** Map of centres involved in the study.

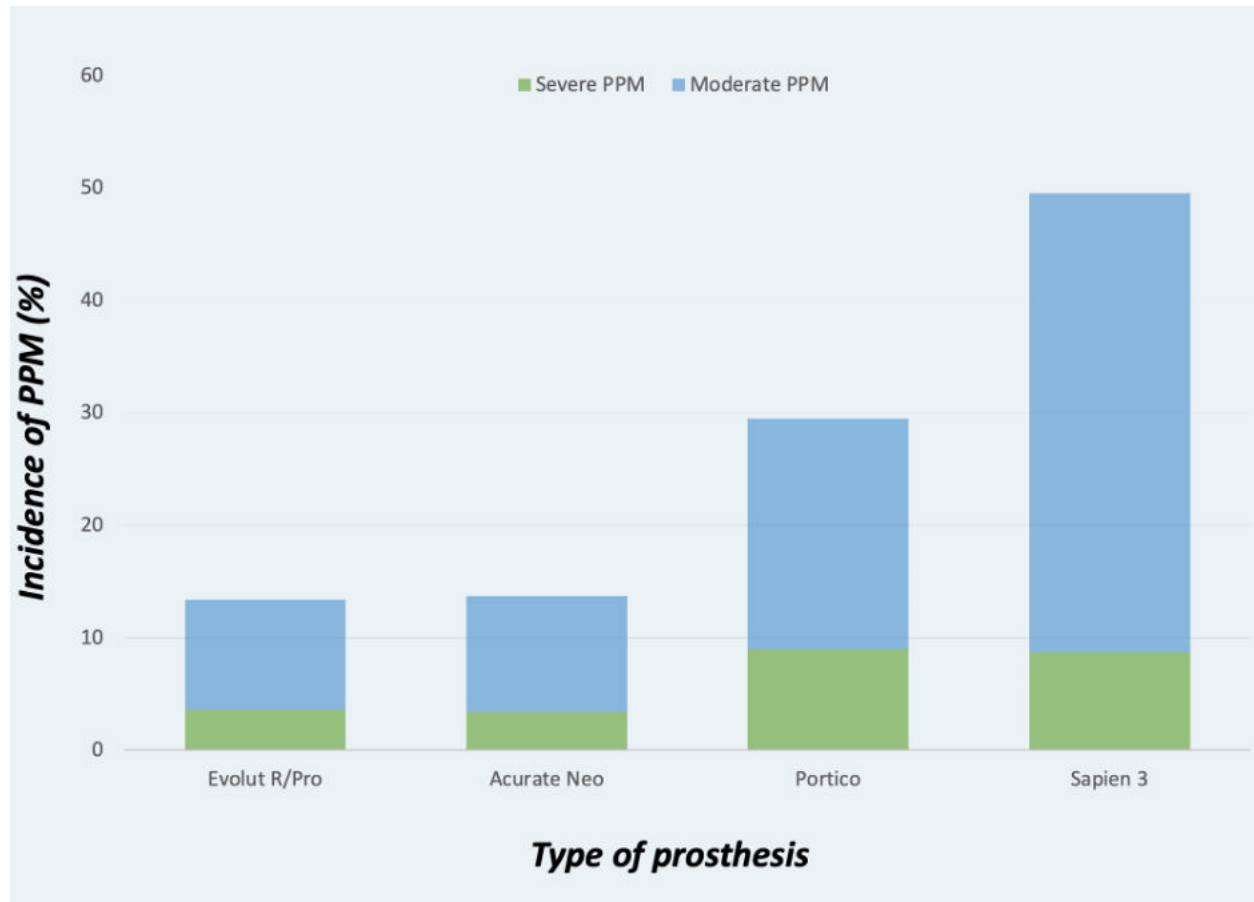

**Supplementary Figure 2.** Incidence of severe and moderate PPM according to prosthesis type.

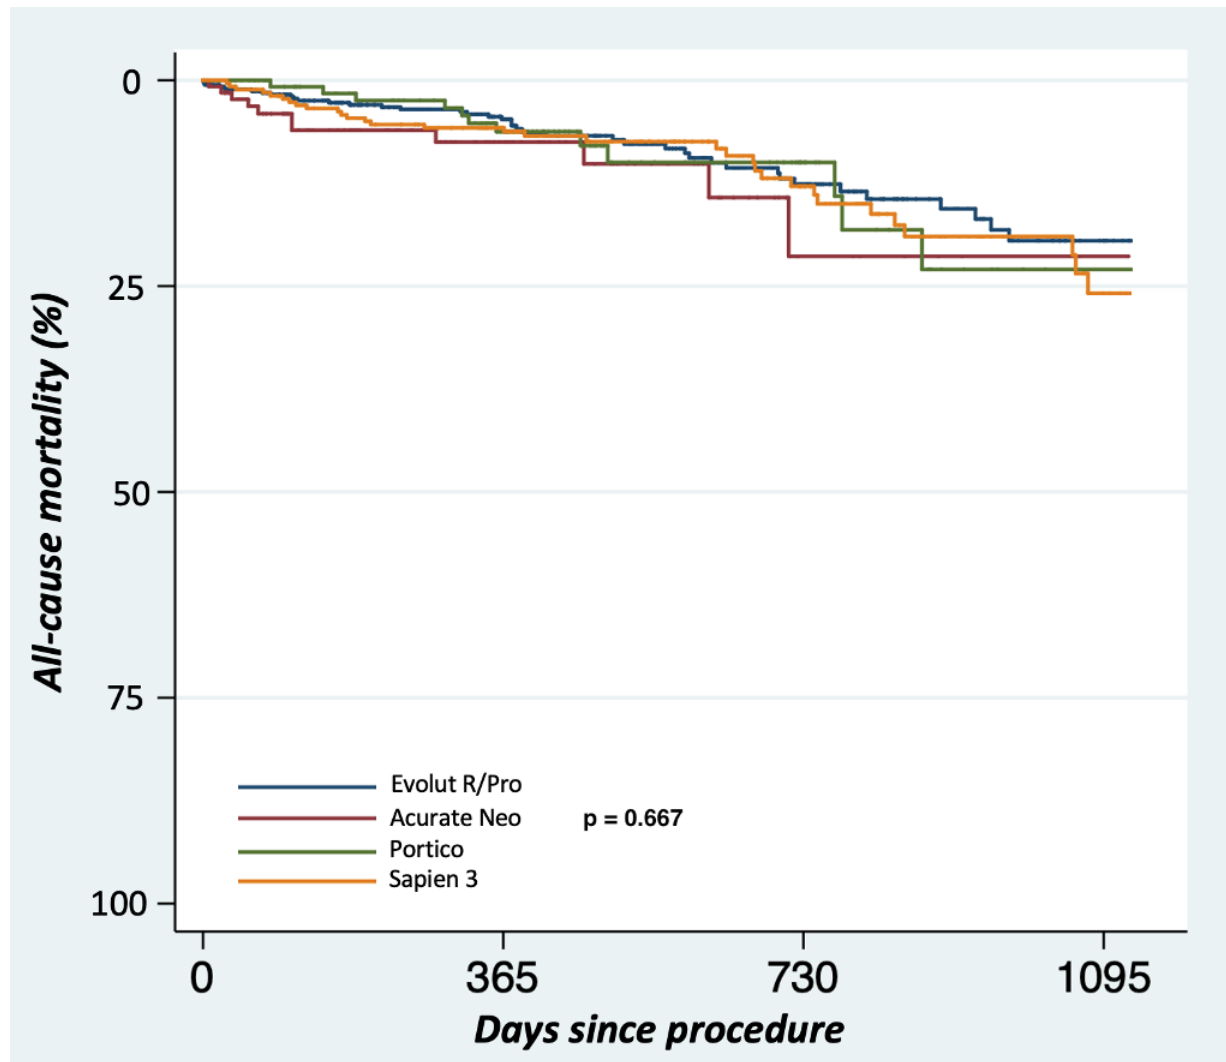

**Supplementary Figure 3.** Kaplan-Meier analysis assessing all-cause mortality according to prosthesis type.
